1           **Zebrafish (*Danio rerio*) behavioral laterality predicts increased short-term**  
2                                   **avoidance memory but not stress-reactivity responses**

3                   Barbara D. Fontana<sup>a\*</sup>, Madeleine Cleal<sup>a</sup>, James M. Clay<sup>a</sup> and Matthew O. Parker<sup>a,b\*</sup>

4           <sup>a</sup>Brain and Behaviour Laboratory, School of Pharmacy and Biomedical Sciences, University of  
5           Portsmouth, UK.

6           <sup>b</sup>The International Zebrafish Neuroscience Research Consortium (ZNRC), 309 Palmer Court, Slidell, LA  
7           70458, USA.

8  
9  
10  
11  
12  
13  
14  
15  
16  
17  
18  
19  
20  
21  
22  
23  
24  
25  
26  
27  
28

29           \*Correspondence to:

30           **Matthew O. Parker, PhD**

31           School of Pharmacy and Biomedical Sciences, University of Portsmouth, Old St Michael's Building, White  
32           Swan Road, Portsmouth, PO1 2DT, UK. E-mail: [matthew.parker@ac.uk](mailto:matthew.parker@ac.uk)

33           **Barbara D. Fontana**

34           School of Pharmacy and Biomedical Sciences, University of Portsmouth, Old St Michael's Building, White  
35           Swan Road, Portsmouth, PO1 2DT, UK. E-mail: [barbara.fontana@port.ac.uk](mailto:barbara.fontana@port.ac.uk)

36 **Abstract**

37           Once considered a uniquely human attribute, behavioral laterality has proven to be  
38 ubiquitous among non-human animals, being frequently associated with different  
39 neurophenotypes in rodents and fish species. Zebrafish (*Danio rerio*) are a versatile and  
40 complementary vertebrate model system that has been widely used in translational  
41 neuropsychiatric research due their highly conserved genetic homology, well characterized  
42 physiological and extensive behavioral repertoire. Although the spontaneous left- and right-bias  
43 responses and associated behavioral domains (e.g. stress reactivity, aggression and learning) have  
44 previously been observed in other teleost species, no information regarding the natural left-right  
45 bias responses of zebrafish has been described. Thus, we aimed to investigate the existence and  
46 incidence of natural left-right bias of adult zebrafish in the Y-maze test and explore any  
47 relationship of biasedness on the performance of different behavioral domains. This included  
48 learning about threat-cues in the fear conditioning test and locomotion and anxiety-related  
49 behavior in the novel tank diving test. In conclusion, we showed for the first time that zebrafish  
50 exhibit a natural manifestation of behavioral lateralization which can influence aversive learning  
51 responses. Although laterality did not change locomotion or anxiety-related behaviors, we found  
52 that biased animals showed a reduction of short-term memory performance in the Y-maze and  
53 increase learning associated to fear cues.

54

55

56 **Keywords:** Anxiety; Behavioral asymmetries; Left-bias; Pavlovian fear conditioning; Right-bias.

57

58

59

60

61

62

## 63 **1. Introduction**

64 Lateralization of brain and behavior is the apparent predisposition towards side bias often  
65 manifested in terms of motor output, such as handedness, and has been widely studied in humans  
66 and animal models, including monkeys (Fagot and Vauclair 1991; Hopkins 1994; McGrew and  
67 Marchant 1997), rodents (Robison 1981; Rodriguez and Afonso 1993; Rodriguez et al. 1992),  
68 birds (Bhagavatula et al. 2014; Franklin and Adams 2010; Gunturkun et al. 1998) and fish (Bibost  
69 and Brown 2014; Bisazza and de Santi 2003; Dadda et al. 2010a; Dadda et al. 2010b). In rodents,  
70 several behavioral tasks have been used to assess behavioral asymmetries such turning rotometers,  
71 handedness, choice behavior, T-maze and Y-maze (Corballis 1986; Pisa and Szechtman 1986;  
72 Zimmerberg and Glick 1974). Variability in lateralization exerts a number of fitness benefits. For  
73 example, lateralization has been associated with maximization of brain processes, enabling  
74 individuals to process two tasks simultaneously (Rogers 2000; Rogers 2002). Moreover, studies  
75 have suggested that laterality evolved at the population level to maintain coordination among  
76 social groups (Rogers 2000).

77 Behavioral laterality is an evolutionarily conserved characteristic which is observed at  
78 populational level in humans and has been associated to different neurophenotypes (Corballis  
79 2017; Frasnelli 2013). Behavioral asymmetries have been related to high escape performance  
80 (Dadda et al. 2010b), social responses (Reddon and Balshine 2010) and even accelerated learning  
81 responses (Andrade et al. 2001) in fish and rodent species. Behavioral laterality has also been  
82 implicated in anxiety and major depressive disorder (MDD) in humans, being cited as a factor in  
83 initiating and maintaining both disorders (Koster et al. 2010; Lichtenstein-Vidne et al. 2017).  
84 Interestingly, EEG studies showed that depressed and anxious patients exhibit abnormal alpha  
85 asymmetry, indicative of low right vs. left parietal activity, confirming that both disorders have a  
86 differential influence on lateralized hemispheric processing of emotional and verbal information  
87 (Bruder et al. 2016; Bruder et al. 1997; Henriques and Davidson 1990; Kentgen et al. 2000; Reid  
88 et al. 1998). Despite the clear relevance of lateralization to human neuropsychological function,

89 we still have a limited understanding of the general origins of morphological and functional  
90 asymmetries in the brain and of their importance for behavior.

91 Zebrafish (*Danio rerio*) is a versatile vertebrate model system that has been widely used in  
92 translational neuropsychiatric research (Fontana et al. 2018; Stewart et al. 2015). The promise of  
93 zebrafish as an alternative organism for modeling human disorders is based on their conserved  
94 genome (Barbazuk et al. 2000; Howe et al. 2013; MacRae and Peterson 2015) and well-  
95 characterized physiology (Holzschuh et al. 2001; MacRae and Peterson 2015; Rico et al. 2011). In  
96 addition to its high genetic and physiological homology with mammals, zebrafish presents a well-  
97 conserved behavioral repertoire (Kalueff et al. 2013) which may be useful in increasing our  
98 understanding of the evolutionary origins and functional relevance of left-right asymmetry. Thus,  
99 zebrafish have much potential for characterizing the mechanisms involved in behavioral laterality.  
100 Although the spontaneous left- and right-bias responses and its correlation to other behavioral  
101 domains (e.g. stress reactivity, aggression and learning) were previously observed in other teleost  
102 fish species (Ariyomo et al. 2013; Bibost and Brown 2014; Byrnes et al. 2016), no information  
103 regarding zebrafishes natural left-right bias responses was previously described. Thus, here we  
104 aimed to investigate the existence and incidence of natural left-right bias of adult zebrafish in the  
105 Y-maze test and explore how this tendency relates to performance on different behavioral  
106 domains, including learning about threat-cues in the fear conditioning test and, locomotion and  
107 anxiety-related behavior in the novel diving tank.

108

## 109 **2. Material and Methods**

### 110 *2.1. Animals*

111 Adult zebrafish (~ 50:50 male: female ratio at 3-month of age) were bred in-house and  
112 reared in standard laboratory conditions on a re-circulating system (Aquanearing, USA). Animals  
113 were maintained on a 14/10-hour light/dark cycle (lights on at 9:00 a.m.), pH 8.4, at ~28.5 °C (±1  
114 °C) in groups of 20 animals per 2.8 L. Fish were fed three times/day with a mixture of live brine  
115 shrimp and flake food, except in the weekend that they were fed once/day. Animals were tested in

116 the Y-maze apparatus and pair-housed for 24 hours for further analysis of shock-avoidance  
117 response to reduce stress from multiple handling in a single day (see **Fig. 1**). After behavioral  
118 tests, all animals were euthanized using 2-phenoxyethanol from Aqua-Sed (Aqua-Sed™,  
119 Vetark, Winchester, UK).

120

## 121 2.2. Y-maze test

122 The Y-maze spontaneous alternation task is widely used for measuring the disposition of  
123 different animal models to explore new environments and to assess left- and right-biased  
124 responses (Barnard et al. 2016; Castellano et al. 1987; Frasnelli 2013; Rodriguez et al. 1992).  
125 One-hundred and one adult zebrafish were used for assessing Y-maze performance and right-left  
126 bias. Required sample size was calculated *a priori* following pilot tests (effect size (d) = 0.3,  
127 power = 0.8, alpha = 0.05). The apparatus consisted of a white Y-maze tank with three identical  
128 arms (5 cm length x 2 cm width; three identical arms at a 120° angle from each other) and a  
129 transparent base, filled with 3L of aquarium water (**Fig. 1**). Ambient light allowed some visibility  
130 in the maze, but no explicit intra-maze cues were added to the environment. Behavioral tests were  
131 performed between 10 a.m. to 4 p.m. using the Zantiks (Zantiks Ltd., Cambridge, UK) AD system  
132 (Brock et al. 2017), and we carried out three independent replicates. The Zantiks AD system was  
133 fully controlled via a web-enabled device during behavioral training. Fish behavior was recorded  
134 for 1 hour and was assessed according to overlapping series of four choices (tetragrams) and  
135 analyzed as a proportion of the total number of turns (Gross et al. 2011). The relative number of  
136 repetitions (rrrr + llll), alternations (rlrl + lrlr), right turns and left turns were also calculated as a  
137 proportion of the total number of turns. The mean and coefficient of variation for right and left  
138 bias was calculated for each animal and behavioral lateralization was considered when the animal  
139 presented >60% of preference for right or left Y-maze arm.

140

141

## 142 2.3. Pavlovian fear conditioning

143           The inhibitory avoidance paradigm is a valid method widely used to explore mechanisms  
144 underlying fear avoidance learning responses in zebrafish (Amorim et al. 2017; Manuel et al.  
145 2014; Manuel et al. 2015; Ng et al. 2012). 24h after the completion of the Y-maze test, animals  
146 ( $n = 55$ ) were tested on a Pavlovian fear conditioning procedure for 1 hour. The fear conditioning  
147 response was based on previous work (Cleal and Parker 2018; Valente et al. 2012). Fish were  
148 individually placed in one of four lanes of a tank (25 cm length x 15 cm, 1 L of water in each  
149 tank) (**Fig. 1**). Briefly, fish were habituated for 30 minutes into the test environment, half check  
150 and half grey base switching position every 5-min. The baseline preference was ascertained over  
151 10-min and only the last 10-min baseline preference was used for assessing the area preference.  
152 Conditioning phase was followed, which consisted in a conditioned stimulus (CS+; full screen of  
153 “check” or “grey”, randomized between each batch) presented for 1.5s and followed by a brief  
154 mild shock (9 V DC, 80ms; unconditioned stimulus (US). After this, an 8.5s of inter-trial interval  
155 (ITI) of the non-CS (CS-) exemplar was presented at the bottom of the tank. The CS+/US was  
156 exhibit nine times. Finally, avoidance of CS+ was assessed by presenting the baseline screen (CS+  
157 and CS- simultaneously) for 1-min, and switching positions after 30-s.

158

#### 159 *2.4. Novel tank diving test*

160           The novel tank diving test is commonly used for analyzing locomotor and anxiety-like  
161 phenotypes in zebrafish presenting a high sensitivity to anxiolytic and anxiogenic drugs (Egan et  
162 al. 2009; Kalueff et al. 2013; Levin et al. 2007; Maximino et al. 2010; Mezzomo et al. 2016;  
163 Wong et al. 2010). 24 hours after the Y-maze test, animals ( $n = 46$ ) were placed individually in a  
164 novel tank (30 cm length x 15 cm height x 12 cm width) containing 4 L of aquarium water.  
165 Behavioral activity was recorded using 2 webcams (front and top view, see **Fig. 1B**) for 5 min to  
166 analyze thigmotaxis and diving response (Egan et al. 2009; Parker et al. 2012; Rosemberg et al.  
167 2012). Behaviors were measured in an automated video-tracking software (EthoVision, Noldus  
168 Information Technology Inc., Leesburg, VA - USA) at a rate of 60 frames/s. The tank was  
169 separated in three virtual areas (bottom, middle and top) to provide a detailed evaluation of

170 vertical activity. The following endpoints were measured: total distance traveled, time spent in  
171 each third of the tank, immobility and thigmotaxis.

172

### 173 *2.5. Randomization and blinding*

174 All behavioral testing was carried out in a fully randomized order, choosing fish at random  
175 from one of ten housing tanks for testing. Fish were screened for left-right bias in the Y-maze  
176 first, but analysis was not carried out prior to subsequent behavioral testing to avoid bias.  
177 Subsequent to Y-maze screening, fish were pair housed and issued a subject ID, allowing all  
178 testing to be carried out in a fully blinded manner. Once all data were collected and screened for  
179 extreme outliers (e.g., fish freezing and returning values of '0' for behavioral parameters  
180 indicating non-engagement), the bias was revealed and data analyzed in full.

181

### 182 *2.6. Data reduction and statistical analysis*

183 Data obtained from the Y-maze protocol was reduced using the Zantiks Y-maze Analysis  
184 Script created especially for this purpose (available from: [https://](https://github.com/thejamesclay/ZANTIKS_YMaze_Analysis_Script)  
185 [/github.com/thejamesclay/ZANTIKS\\_YMaze\\_Analysis\\_Script](https://github.com/thejamesclay/ZANTIKS_YMaze_Analysis_Script)). Subsequently, data were  
186 analyzed in IBM SPSS® Statistics and the results were expressed as means ± standard error of the  
187 mean (S.E.M). To assess whether there were any effects of bias on total turns, alternations (lrlr +  
188 rlr), repetitions (rrrr + llll) and novel tank responses we used linear mixed effects model (Poisson  
189 distribution, log link), with bias and time as fixed factors, and ID as a random factor (to account  
190 for non-independence of replicates). Additionally, left-right bias effects on shock avoidance test  
191 was assessed using two-way repeated measures ANOVA with 'bias' (left vs right vs neutral) and  
192 conditioning (pre-vs-post) as factors, and preference for conditioned stimulus as the dependent  
193 variable. Newman-Keuls test was used as post-hoc analysis, and results were considered  
194 significant when  $p \leq 0.05$ .

## 195 **3. Results**

### 196 *2.1. Left-right bias profile in the Y-maze test*

197 Zebrafish showed behavioral lateralization in the Y-maze (right-biased 27.18 %, left-  
198 biased 27.18% and non-biased 45.63%). To confirm if the behavioral laterality was consistent  
199 across time, the coefficient of variation for the left and right turn preferences were calculated for  
200 the non-biased ( $19.28 \pm 2.52$  and  $21.05 \pm 2.95$ ), left-biased ( $30.40 \pm 3.85$  and  $21.7 \pm 3.61$ ) and  
201 right-biased ( $27.23 \pm 5.52$  and  $25.95 \pm 2.31$ ) groups. **Figure 2** displays the Y-maze data. A  
202 significant bias effect was observed for number of turns ( $F_{(2, 601)} = 13.115$ ;  $p < 0.0001$ ), repetitions  
203 ( $F_{(2, 601)} = 39.696$ ;  $p < 0.0001$ ) and alternations ( $F_{(2, 601)} = 45.437$ ;  $p < 0.0001$ ). A time effect (data  
204 not shown) was also observed for number of turns ( $F_{(5, 601)} = 9.769$ ;  $p < 0.0001$ ), repetitions ( $F_{(5, 601)} = 3.242$ ;  $p = 0.007$ ) and alternations ( $F_{(5, 601)} = 3.801$ ;  $p = 0.002$ ). Additionally, a significant  
205 interaction effect (bias \* time) was observed for repetitions ( $F_{(10, 601)} = 2.504$ ;  $p = 0.006$ ) and  
206 alternations ( $F_{(10, 601)} = 2.390$ ;  $p = 0.009$ ). Right-biased significantly increased the number of  
207 repetitions ( $p < 0.0001$ ) and, decreased the number of turns ( $p < 0.05$ ) and alternations ( $p < 0.0001$ )  
208 compared to non-biased animals. Meanwhile, left-biased animals had an increased number of  
209 repetitions ( $p < 0.001$ ) and decreased alternations ( $p < 0.005$ ) compared to non-biased group.  
210 Moreover, right-biased animals had a significant increase of repetitions ( $p < 0.05$ ) and decrease of  
211 alternations ( $p < 0.05$ ) even when compared to left-biased animals (**Fig. 2A**). The behavioral profile  
212 of biased and non-biased animals is displayed in **Fig. 2B** tetragrams where a high number of llll  
213 and rrrr configuration can be observed for left- and right-biased animals, respectively.

215

## 216 2.2. Short-term avoidance memory and novelty response of biased animals

217 Although no interaction effect bias vs. shock ( $F_{(2, 98)} = 1.259$ ;  $p = 0.312$ ) was observed for  
218 the Pavlovian responses, a significant effect for bias ( $F_{(2, 98)} = 3.128$ ;  $p = 0.035$ ) and shock ( $F_{(1, 98)} =$   
219  $79.47$ ;  $p < 0.0001$ ) effect was founded. ANOVA often is underpowered to detect the significance of  
220 interaction terms (Wahlsten 1990), and therefore further analysis was performed to specifically  
221 analyze interaction effects. Concerning this, all biased and non-biased animals had a decreased  
222 time spent in the preference for conditioned stimulus. Moreover, both left- and right- biased  
223 animals ( $p < 0.05$ ) had a significantly decreased time spent in the conditioned area compared to



224 non-biased group (**Fig. 3**). No significant effect was observed for bias in all novel tank diving test-  
225 related parameters, including distance travelled ( $F_{(2, 43)} = 0.683$ ;  $p = 0.510$ ), immobility ( $F_{(2, 43)} =$   
226  $2.348$ ;  $p = 0.107$ ), time in tank zones time ( $F_{(2, 129)} = 0.084$ ;  $p = 0.918$ ) (**Fig. 4**) and thigmotaxis  
227 ( $F_{(2, 43)} = 1.289$ ;  $p = 0.286$ ) (**Fig. 5**).

228

#### 229 **4. Discussion**

230 In this study we evaluated left-right bias from unconditioned Y-maze performance and  
231 evaluated the predictive validity of Y-maze performance on both unconditioned and conditioned  
232 measures of fear/anxiety. We showed, for the first time, that the zebrafish presents natural  
233 behavioral laterality in the Y-maze test, suggesting that the protocol may be useful for screening  
234 this species for behavioral asymmetry. Second, we found that behaviorally lateralized animals  
235 show decreased pure alternation responses in the Y-maze, and increased pure repetition,  
236 suggesting that learning and memory may be partially inhibited in lateralized animals. Third, we  
237 observed that behavioral asymmetry predicts increased learning in a Pavlovian fear conditioning  
238 protocol but did not predict measures of unconditioned anxiety (novel tank test, thigmotaxis).  
239 Collectively, these data suggest, contrary to theories that laterality is related to increased stress-  
240 reactivity, that increased behavioral laterality may be related to increased cue-reactivity,  
241 particularly in relation to aversive cues. This has connotations for translational models of human  
242 disorders of affective state, in which heightened attention to threat-related cues is observed  
243 (Lichtenstein-Vidne et al. 2017) and in which brain and behavioral laterality are thought to be risk  
244 factors (Bruder et al. 2016).

245 Left-right asymmetries in behavioral protocols including the T-maze and Y-maze have  
246 been widely utilized in rodents (Andrade et al. 2001; Nakagawa et al. 2004; Rodriguez et al.  
247 1992). Here, for the first time, we observed that approximately a quarter of zebrafish present  
248 substantial natural left- (27.18 %) or right- (27.18%) locomotor lateralization, with the remaining  
249 45.63% animals showing stochastic patterns of left/right. These data are somewhat at odds from

250 observed bias in rodent models, in which there is a high number of right-biased animals (52.8%)  
251 and low numbers of left- (22.2%) and non-biased responses (25%) (Andrade et al., 2001).

252 We observed that behavioral laterality has an important role in Y-maze performance,  
253 where left-right biased animals presented an increase of repetition behavior and decrease of  
254 alternation, in particular in the left-biased animals. The relative frequency of pure alternations  
255 (lrlr, rlrl) to pure repetitions (llll, rrrr) is thought to be a measure of short-term memory (Cleal and  
256 Parker 2018; Gross et al. 2011). Alterations have been directly associated with functionally  
257 distinct search patterns, where the seeking for change and novelty may have a role in their  
258 exploratory profiles (Kool et al. 2010). Interestingly, decreases in pure alternations and increases  
259 in pure repetition behavior in lateralized animals was first described by Rodriguez et al. (1992),  
260 who demonstrated that both stress and over-training decrease the alternation/repetition ratio  
261 through the promotion of an increase of biased responses. Overall, we confirmed that both  
262 alternations and repetitions remain as a highly reliable behavioral pattern that is conserved across  
263 species (Ghafouri et al. 2016; Lewis et al. 2017; Pickering et al. 2015).

264 In agreement with previously studies (Andrade et al. 2001), we showed that locomotor  
265 lateralization is associated to increased learning in a Pavlovian fear conditioning protocol. This  
266 appears, initially, to be at odds with our observations regarding memory in the Y-maze  
267 (operationally defined as variation in alternation/repetition). However, the most predominant  
268 theory of how left-right bias affects learning and cognitive processing relates to a hypothesized  
269 increased stress-reactivity in lateralized animals (Carlson and Glick 1989; Neveu 1996;  
270 Westergaard et al. 2001). Interindividual differences in laterality have been shown to covary with,  
271 or predict, individual differences in stress-reactivity and susceptibility to stress-related pathology  
272 (Byrnes et al. 2016; Carlson and Glick 1989; Fride and Weinstock 1989; Ocklenburg et al. 2016).  
273 Here, we tested the hypothesis that left- and right-biased animals would differ in measures of  
274 stress-reactivity and anxiety-like phenotypes (Blaser and Rosemberg 2012; Egan et al. 2009;  
275 Parker et al. 2012). We found no significant differences in lateralized animals in our measures of  
276 anxiety, suggesting that the observed differences in behavioral phenotypes observed in the Y-

277 maze and shock avoidance learning seems to not be related to stress-reactivity responses *per se*.  
278 Instead, our data may suggest that the lateralized fish are more reactive to stress-related cues. This  
279 would explain the increased performance on the Pavlovian fear conditioning, the fact that there  
280 were no differences in measures of anxiety, and the reduced memory on the Y-maze test.

281         There are several theories regarding the mechanisms underlining behavior laterality in  
282 simple maze tasks. Diaz Palarea et al. (1987) were the first to report that left-right biased animals,  
283 as assessed via spatial asymmetry in a T-maze, had alterations in dopaminergic (DA) signaling.  
284 In addition, apomorphine (DA receptor agonist) and 6-hydroxydopamine lesions alters behavioral  
285 laterality of animals in the T-maze test (Castellano et al. 1987) and Y-maze (Nakagawa et al.  
286 2004), confirming the involvement of DA system in behavioral asymmetry. DA receptors are  
287 strongly implicated in emotional learning and recall of emotionally relevant events in rats. For  
288 example, activation of D4-receptors in the medial pre-frontal cortex potentiates fear-associated  
289 memory formation but has no impact on recall (Lauzon et al. 2009; Laviolette et al. 2005),  
290 whereas activation of D1-like receptors blocks recalls of previously learned fear-associated  
291 memories but has no impact on learning (Lauzon et al. 2009), suggesting a double dissociation of  
292 function. Interestingly, the serotonergic (5-HT) system has also been shown to have an important  
293 role in mediating individual differences in anxiety-like responses and locomotor activity in  
294 zebrafish and exerts a minor modulatory role of the DA system (Tran et al. 2016). Both behavioral  
295 laterality and aversive memory is mostly associated with modulatory action of DA system, but the  
296 5-HT system has a major role modulating zebrafish responses to novelty. The precise mechanisms  
297 of how behavioral laterality modulates neuropsychiatric conditions are yet to be firmly  
298 established, and further studies are required to better understand the mechanisms in which  
299 behavioral laterality modulates aversive memory in zebrafish.

300

## 301 **5. Conclusion**

302         Overall, we showed for the first time that zebrafish exhibits natural manifestation of  
303 behavioral lateralization and it can influence on aversive learning responses. We found that bias

304 animals show a reduction of short-term memory performance in the Y-maze, but an increase in  
305 learning in a Pavlovian fear conditioning protocol. Coupled with a lack of differences between  
306 lateralized and non-lateralized animals in unconditioned tests of anxiety, our data suggest that  
307 lateralized zebrafish may show heightened reactivity to fear related cues. These results have  
308 important connotations for translational models of depression and anxiety, particularly in the light  
309 of well-established links between laterality and anxiety/depression in humans. Finally, because  
310 biased animals present different behavioral performances in the Y-maze and Pavlovian fear  
311 conditioning protocols, left- and right- preference should be considered when working with  
312 zebrafish behavior, particularly to control variability in performance on more complex tasks.

313

#### 314 **Compliance with Ethical Standards**

#### 315 **Funding**

316 This study was financed in part by the Coordenação de Aperfeiçoamento de Pessoal de  
317 Nível Superior - Brazil (CAPES) - Finance Code 001 at the University of Portsmouth, UK. MOP  
318 receives funding from the British Academy (BA). MC is supported by a Science Faculty  
319 Studentship from the University of Portsmouth.

320

#### 321 **Conflict of interest**

322 The authors declare that no conflict of interest exists.

323

#### 324 **Ethical approval**

325 All experiments were carried out following scrutiny by the University of Portsmouth  
326 Animal Welfare and Ethical Review Board, and under license from the UK Home Office  
327 (Animals (Scientific Procedures) Act, 1986) [PPL: P9D87106F].

328

#### 329 **References**

330 Amorim RR, Silva PF, Luchiari AC (2017) Effects of Alcohol on Inhibitory Avoidance Learning in  
331 Zebrafish (*Danio rerio*) *Zebrafish* 14:430-437 doi:10.1089/zeb.2017.1438

- 332 Andrade C, Alwarshetty M, Sudha S, Suresh Chandra J (2001) Effect of innate direction bias on T-maze  
333 learning in rats: implications for research *Journal of neuroscience methods* 110:31-35
- 334 Ariyomo TO, Carter M, Watt PJ (2013) Heritability of boldness and aggressiveness in the zebrafish *Behav*  
335 *Genet* 43:161-167 doi:10.1007/s10519-013-9585-y
- 336 Barbazuk WB et al. (2000) The syntenic relationship of the zebrafish and human genomes *Genome*  
337 *research* 10:1351-1358
- 338 Barnard S, Matthews L, Messori S, Podaliri-Vulpiani M, Ferri N (2016) Laterality as an indicator of  
339 emotional stress in ewes and lambs during a separation test *Animal cognition* 19:207-214  
340 doi:10.1007/s10071-015-0928-3
- 341 Bhagavatula PS, Claudianos C, Ibbotson MR, Srinivasan MV (2014) Behavioral lateralization and optimal  
342 route choice in flying budgerigars *PLoS computational biology* 10:e1003473  
343 doi:10.1371/journal.pcbi.1003473
- 344 Bibost AL, Brown C (2014) Laterality influences cognitive performance in rainbowfish *Melanotaenia*  
345 *duboulayi* *Animal cognition* 17:1045-1051 doi:10.1007/s10071-014-0734-3
- 346 Bisazza A, de Santi A (2003) Lateralization of aggression in fish *Behavioural brain research* 141:131-136
- 347 Blaser RE, Rosemberg DB (2012) Measures of anxiety in zebrafish (*Danio rerio*): dissociation of  
348 black/white preference and novel tank test *PloS one* 7:e36931 doi:10.1371/journal.pone.0036931
- 349 Brock AJ, Goody SMG, Mead AN, Sudwarts A, Parker MO, Brennan CH (2017) Assessing the Value of  
350 the Zebrafish Conditioned Place Preference Model for Predicting Human Abuse Potential *The*  
351 *Journal of pharmacology and experimental therapeutics* 363:66-79 doi:10.1124/jpet.117.242628
- 352 Bruder GE et al. (2016) Brain laterality, depression and anxiety disorders: New findings for emotional and  
353 verbal dichotic listening in individuals at risk for depression *Laterality* 21:525-548  
354 doi:10.1080/1357650X.2015.1105247
- 355 Bruder GE et al. (1997) Regional brain asymmetries in major depression with or without an anxiety  
356 disorder: a quantitative electroencephalographic study *Biological psychiatry* 41:939-948  
357 doi:10.1016/S0006-3223(96)00260-0
- 358 Byrnes EE, Vila Pouca C, Brown C (2016) Laterality strength is linked to stress reactivity in Port Jackson  
359 sharks (*Heterodontus portusjacksoni*) *Behavioural brain research* 305:239-246  
360 doi:10.1016/j.bbr.2016.02.033
- 361 Carlson JN, Glick SD (1989) Cerebral lateralization as a source of interindividual differences in behavior  
362 *Experientia* 45:788-798
- 363 Castellano MA, Diaz-Palarea MD, Rodriguez M, Barroso J (1987) Lateralization in male rats and  
364 dopaminergic system: evidence of right-side population bias *Physiology & behavior* 40:607-612
- 365 Cleal M, Parker MO (2018) Moderate developmental alcohol exposure reduces repetitive alternation in a  
366 zebrafish model of fetal alcohol spectrum disorders *Neurotoxicology and teratology* 70:1-9  
367 doi:10.1016/j.ntt.2018.09.001
- 368 Corballis MC (1986) Brain asymmetries: cerebral lateralization in nonhuman species *Science* 231:1022-  
369 1023 doi:10.1126/science.231.4741.1022-a
- 370 Corballis MC (2017) The Evolution of Lateralized Brain Circuits *Frontiers in psychology* 8:1021  
371 doi:10.3389/fpsyg.2017.01021
- 372 Dadda M, Domenichini A, Piffer L, Argenton F, Bisazza A (2010a) Early differences in epithalamic left-  
373 right asymmetry influence lateralization and personality of adult zebrafish *Behavioural brain*  
374 *research* 206:208-215 doi:10.1016/j.bbr.2009.09.019
- 375 Dadda M, Koolhaas WH, Domenici P (2010b) Behavioural asymmetry affects escape performance in a  
376 teleost fish *Biology letters* 6:414-417 doi:10.1098/rsbl.2009.0904
- 377 Diaz Palarea MD, Gonzalez MC, Rodriguez M (1987) Behavioral lateralization in the T-maze and  
378 monoaminergic brain asymmetries *Physiology & behavior* 40:785-789
- 379 Egan RJ et al. (2009) Understanding behavioral and physiological phenotypes of stress and anxiety in  
380 zebrafish *Behavioural brain research* 205:38-44 doi:10.1016/j.bbr.2009.06.022
- 381 Fagot J, Vauclair J (1991) Manual laterality in nonhuman primates: a distinction between handedness and  
382 manual specialization *Psychological bulletin* 109:76-89
- 383 Fontana BD, Mezzomo NJ, Kalueff AV, Rosemberg DB (2018) The developing utility of zebrafish models  
384 of neurological and neuropsychiatric disorders: A critical review *Experimental neurology* 299:157-  
385 171 doi:10.1016/j.expneurol.2017.10.004
- 386 Franklin RG, Jr., Adams RB, Jr. (2010) The two sides of beauty: laterality and the duality of facial  
387 attractiveness *Brain and cognition* 72:300-305 doi:10.1016/j.bandc.2009.10.002
- 388 Frasnelli E (2013) Brain and behavioral lateralization in invertebrates *Frontiers in psychology* 4:939  
389 doi:10.3389/fpsyg.2013.00939

- 390 Fride E, Weinstock M (1989) Alterations in behavioral and striatal dopamine asymmetries induced by  
391 prenatal stress *Pharmacology, biochemistry, and behavior* 32:425-430
- 392 Ghafouri S, Fathollahi Y, Javan M, Shojaei A, Asgari A, Mirnajafi-Zadeh J (2016) Effect of low frequency  
393 stimulation on impaired spontaneous alternation behavior of kindled rats in Y-maze test *Epilepsy*  
394 *research* 126:37-44 doi:10.1016/j.eplepsyres.2016.06.010
- 395 Gross AN, Engel AK, Richter SH, Garner JP, Wurbel H (2011) Cage-induced stereotypies in female ICR  
396 CD-1 mice do not correlate with recurrent perseveration *Behavioural brain research* 216:613-620  
397 doi:10.1016/j.bbr.2010.09.003
- 398 Gunturkun O, Hellmann B, Melsbach G, Prior H (1998) Asymmetries of representation in the visual  
399 system of pigeons *Neuroreport* 9:4127-4130
- 400 Henriques JB, Davidson RJ (1990) Regional brain electrical asymmetries discriminate between previously  
401 depressed and healthy control subjects *Journal of abnormal psychology* 99:22-31
- 402 Holzschuh J, Ryu S, Aberger F, Driever W (2001) Dopamine transporter expression distinguishes  
403 dopaminergic neurons from other catecholaminergic neurons in the developing zebrafish embryo  
404 *Mechanisms of development* 101:237-243
- 405 Hopkins WD (1994) Hand preferences for bimanual feeding in 140 captive chimpanzees (*Pan troglodytes*):  
406 rearing and ontogenetic determinants *Developmental psychobiology* 27:395-407  
407 doi:10.1002/dev.420270607
- 408 Howe K et al. (2013) The zebrafish reference genome sequence and its relationship to the human genome  
409 *Nature* 496:498-503 doi:10.1038/nature12111
- 410 Kalueff AV et al. (2013) Towards a comprehensive catalog of zebrafish behavior 1.0 and beyond *Zebrafish*  
411 10:70-86 doi:10.1089/zeb.2012.0861
- 412 Kentgen LM, Tenke CE, Pine DS, Fong R, Klein RG, Bruder GE (2000) Electroencephalographic  
413 asymmetries in adolescents with major depression: influence of comorbidity with anxiety disorders  
414 *Journal of abnormal psychology* 109:797-802
- 415 Kool W, McGuire JT, Rosen ZB, Botvinick MM (2010) Decision making and the avoidance of cognitive  
416 demand *Journal of experimental psychology General* 139:665-682 doi:10.1037/a0020198
- 417 Koster EH, De Raedt R, Leyman L, De Lissnyder E (2010) Mood-congruent attention and memory bias in  
418 dysphoria: Exploring the coherence among information-processing biases *Behaviour research and*  
419 *therapy* 48:219-225 doi:10.1016/j.brat.2009.11.004
- 420 Lauzon NM, Bishop SF, Laviolette SR (2009) Dopamine D1 versus D4 receptors differentially modulate  
421 the encoding of salient versus nonsalient emotional information in the medial prefrontal cortex *The*  
422 *Journal of neuroscience : the official journal of the Society for Neuroscience* 29:4836-4845  
423 doi:10.1523/JNEUROSCI.0178-09.2009
- 424 Laviolette SR, Lipski WJ, Grace AA (2005) A subpopulation of neurons in the medial prefrontal cortex  
425 encodes emotional learning with burst and frequency codes through a dopamine D4 receptor-  
426 dependent basolateral amygdala input *The Journal of neuroscience : the official journal of the*  
427 *Society for Neuroscience* 25:6066-6075 doi:10.1523/JNEUROSCI.1168-05.2005
- 428 Levin ED, Bencan Z, Cerutti DT (2007) Anxiolytic effects of nicotine in zebrafish *Physiology & behavior*  
429 90:54-58 doi:10.1016/j.physbeh.2006.08.026
- 430 Lewis SA, Negelspach DC, Kaladchibachi S, Cowen SL, Fernandez F (2017) Spontaneous alternation: A  
431 potential gateway to spatial working memory in *Drosophila* *Neurobiology of learning and memory*  
432 142:230-235 doi:10.1016/j.nlm.2017.05.013
- 433 Lichtenstein-Vidne L, Okon-Singer H, Cohen N, Todder D, Aue T, Nemets B, Henik A (2017) Attentional  
434 bias in clinical depression and anxiety: The impact of emotional and non-emotional distracting  
435 information *Biological psychology* 122:4-12 doi:10.1016/j.biopsycho.2016.07.012
- 436 MacRae CA, Peterson RT (2015) Zebrafish as tools for drug discovery *Nature reviews Drug discovery*  
437 14:721-731 doi:10.1038/nrd4627
- 438 Manuel R, Gorissen M, Roca CP, Zethof J, van de Vis H, Flik G, van den Bos R (2014) Inhibitory  
439 avoidance learning in zebrafish (*Danio rerio*): effects of shock intensity and unraveling differences  
440 in task performance *Zebrafish* 11:341-352 doi:10.1089/zeb.2013.0970
- 441 Manuel R, Zethof J, Flik G, van den Bos R (2015) Providing a food reward reduces inhibitory avoidance  
442 learning in zebrafish *Behavioural processes* 120:69-72 doi:10.1016/j.beproc.2015.08.013
- 443 Maximino C, de Brito TM, da Silva Batista AW, Herculano AM, Morato S, Gouveia A, Jr. (2010)  
444 Measuring anxiety in zebrafish: a critical review *Behavioural brain research* 214:157-171  
445 doi:10.1016/j.bbr.2010.05.031
- 446 McGrew WC, Marchant LF (1997) On the other hand: Current issues in and meta-analysis of the  
447 behavioral laterality of hand function in nonhuman primates *Physical Anthropology* 104:201-232



- 448 Mezzomo NJ, Silveira A, Giuliani GS, Quadros VA, Rosemberg DB (2016) The role of taurine on anxiety-  
449 like behaviors in zebrafish: A comparative study using the novel tank and the light-dark tasks  
450 Neuroscience letters 613:19-24 doi:10.1016/j.neulet.2015.12.037
- 451 Nakagawa M, Ohgoh M, Nishizawa Y, Ogura H (2004) Dopaminergic agonists and muscarinic antagonists  
452 improve lateralization in hemiparkinsonian rats in a novel exploratory Y-maze The Journal of  
453 pharmacology and experimental therapeutics 309:737-744 doi:10.1124/jpet.103.059519
- 454 Neveu PJ (1996) Lateralization and stress responses in mice: Interindividual differences in the association  
455 of brain, neuroendocrine, and immune responses Behavior Genetics 26:373-377
- 456 Ng MC, Hsu CP, Wu YJ, Wu SY, Yang YL, Lu KT (2012) Effect of MK-801-induced impairment of  
457 inhibitory avoidance learning in zebrafish via inactivation of extracellular signal-regulated kinase  
458 (ERK) in telencephalon Fish physiology and biochemistry 38:1099-1106 doi:10.1007/s10695-011-  
459 9595-8
- 460 Ocklenburg S, Korte SM, Peterburs J, Wolf OT, Gunturkun O (2016) Stress and laterality - The  
461 comparative perspective Physiology & behavior 164:321-329 doi:10.1016/j.physbeh.2016.06.020
- 462 Parker MO, Millington ME, Combe FJ, Brennan CH (2012) Housing conditions differentially affect  
463 physiological and behavioural stress responses of zebrafish, as well as the response to anxiolytics  
464 PloS one 7:e34992 doi:10.1371/journal.pone.0034992
- 465 Pickering C, Alsio J, Morud J, Ericson M, Robbins TW, Soderpalm B (2015) Ethanol impairment of  
466 spontaneous alternation behaviour and associated changes in medial prefrontal glutamatergic gene  
467 expression precede putative markers of dependence Pharmacology, biochemistry, and behavior  
468 132:63-70 doi:10.1016/j.pbb.2015.02.021
- 469 Pisa M, Szechtman H (1986) Lateralized and compulsive exteroceptive orientation in rats treated with  
470 apomorphine Neuroscience letters 64:41-46
- 471 Reddon AR, Balshine S (2010) Lateralization in response to social stimuli in a cooperatively breeding  
472 cichlid fish Behavioural processes 85:68-71 doi:10.1016/j.beproc.2010.06.008
- 473 Reid SA, Duke LM, Allen JJ (1998) Resting frontal electroencephalographic asymmetry in depression:  
474 inconsistencies suggest the need to identify mediating factors Psychophysiology 35:389-404
- 475 Rico EP, Rosemberg DB, Seibt KJ, Capiotti KM, Da Silva RS, Bonan CD (2011) Zebrafish  
476 neurotransmitter systems as potential pharmacological and toxicological targets Neurotoxicology  
477 and teratology 33:608-617 doi:10.1016/j.ntt.2011.07.007
- 478 Robison DN (1981) Conceptual aspects of "laterality" syndromes Behavioral and Brain Sciences 4:33-34
- 479 Rodriguez M, Afonso D (1993) Ontogeny of T-maze behavioral lateralization in rats Physiology &  
480 behavior 54:91-94
- 481 Rodriguez M, Gomez C, Alonso J, Afonso D (1992) Laterality, alternation, and perseveration relationships  
482 on the T-maze test Behavioral Neuroscience 106:974-980
- 483 Rogers LJ (2000) Evolution of hemispheric specialization: advantages and disadvantages Brain and  
484 language 73:236-253 doi:10.1006/brln.2000.2305
- 485 Rogers LJ (2002) Lateralization in vertebrates: its early evolution, general pattern and development  
486 Advances in the study of behavioral and Brain Sciences 31:107 - 162
- 487 Rosemberg DB et al. (2012) Behavioral effects of taurine pretreatment in zebrafish acutely exposed to  
488 ethanol Neuropharmacology 63:613-623 doi:10.1016/j.neuropharm.2012.05.009
- 489 Stewart AM, Ullmann JF, Norton WH, Parker MO, Brennan CH, Gerlai R, Kalueff AV (2015) Molecular  
490 psychiatry of zebrafish Molecular psychiatry 20:2-17 doi:10.1038/mp.2014.128
- 491 Tran S, Nowicki M, Muraleetharan A, Chatterjee D, Gerlai R (2016) Neurochemical factors underlying  
492 individual differences in locomotor activity and anxiety-like behavioral responses in zebrafish  
493 Progress in neuro-psychopharmacology & biological psychiatry 65:25-33  
494 doi:10.1016/j.pnpbp.2015.08.009
- 495 Valente A, Huang KH, Portugues R, Engert F (2012) Ontogeny of classical and operant learning behaviors  
496 in zebrafish Learning & memory 19:170-177 doi:10.1101/lm.025668.112
- 497 Wahlsten D (1990) Insensitivity of the analysis of variance to heredity-environment interaction Behavioral  
498 and Brain Sciences 13:109-120
- 499 Westergaard GC, Lussier ID, Suomi SJ, Higley JD (2001) Stress correlates of hand preference in rhesus  
500 macaques Developmental psychobiology 38:110-115
- 501 Wong K et al. (2010) Analyzing habituation responses to novelty in zebrafish (Danio rerio) Behavioural  
502 brain research 208:450-457 doi:10.1016/j.bbr.2009.12.023
- 503 Zimmerberg B, Glick SD (1974) Rotation and stereotypy during electrical stimulation of the caudate  
504 nucleus Research communications in chemical pathology and pharmacology 8:195

505

## 506 **Figure Captions**

507 **Figure 1.** Schematic representation of the experimental design and the behavioral tasks.

508

509 **Figure 2.** Effects of left- and right- bias in zebrafish on the Y-maze test. (A) Laterality affects  
510 total number of turns, repetitions and alternation of adult zebrafish. (B) Y-maze tetragrams  
511 showing the behavioral phenotype of biased and non-biased animals. Data were represented as  
512 mean  $\pm$  S.E.M. and analyzed by linear mixed effects, followed by Tukey's multiple comparison  
513 test. Asterisks indicates statistical differences compared to non-biased group or between biased  
514 groups (\* $p < 0.05$ , \*\* $p < 0.01$ , \*\*\* $p < 0.001$  and \* $p < 0.0001$ ,  $n = 47$  non-biased,  $n = 28$  left-biased  
515 and  $n = 28$  right-biased group).

516

517 **Figure 3.** Left- and right- bias are related to fear avoidance learning responses in adult zebrafish.  
518 Data were represented as mean  $\pm$  S.E.M. and analyzed by two-way RM ANOVA, followed by  
519 Tukey's multiple comparison test. Asterisks indicates statistical differences compared to non-  
520 biased group or between biased groups (\* $p < 0.05$ , \*\* $p < 0.01$ , \*\*\* $p < 0.001$  and \* $p < 0.0001$ ,  $n =$   
521  $25$  non-biased,  $n = 17$  left-biased and  $n = 13$  right-biased group).

522

523 **Figure 4.** Behavioral laterality is not related to locomotor or anxiety-related phenotypes in adult  
524 zebrafish. Data were represented as mean  $\pm$  S.E.M. and analyzed by linear mixed effects ( $n = 22$   
525 non-biased,  $n = 11$  left-biased and  $n = 15$  right-biased group).

526

527 **Figure 5.** Left- and right- bias do not change thigmotaxis in adult zebrafish. Data were  
528 represented as mean  $\pm$  S.E.M. and analyzed by linear mixed effects ( $n = 20$  non-biased,  $n = 11$   
529 left-biased and  $n = 15$  right-biased group).



### Y-maze test

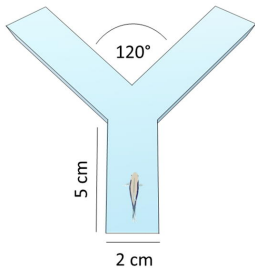

$n = 46$

### Novel tank diving test

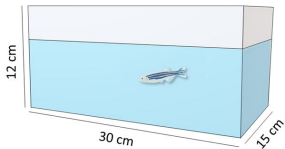

24 hours later

### Pavlovian fear conditioning

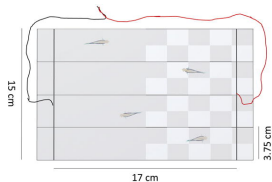

$n = 55$

**A**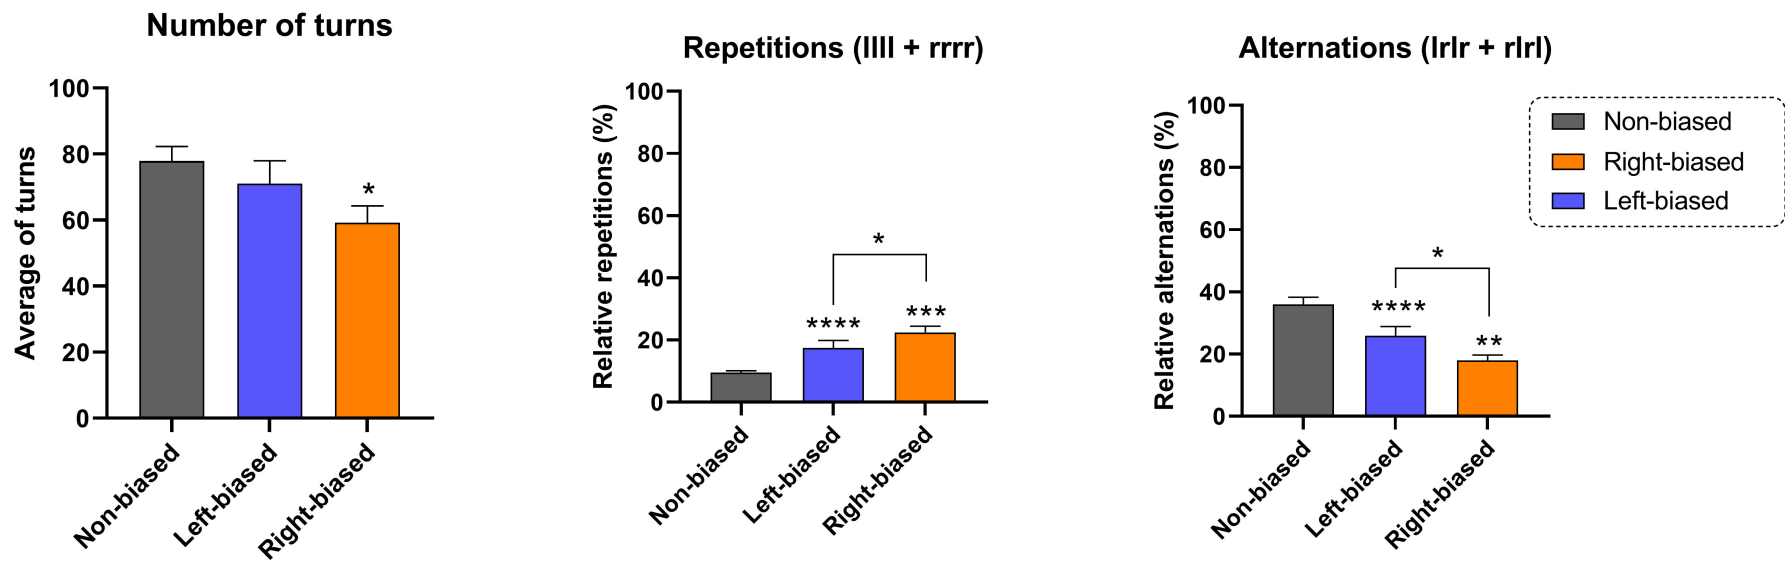**B**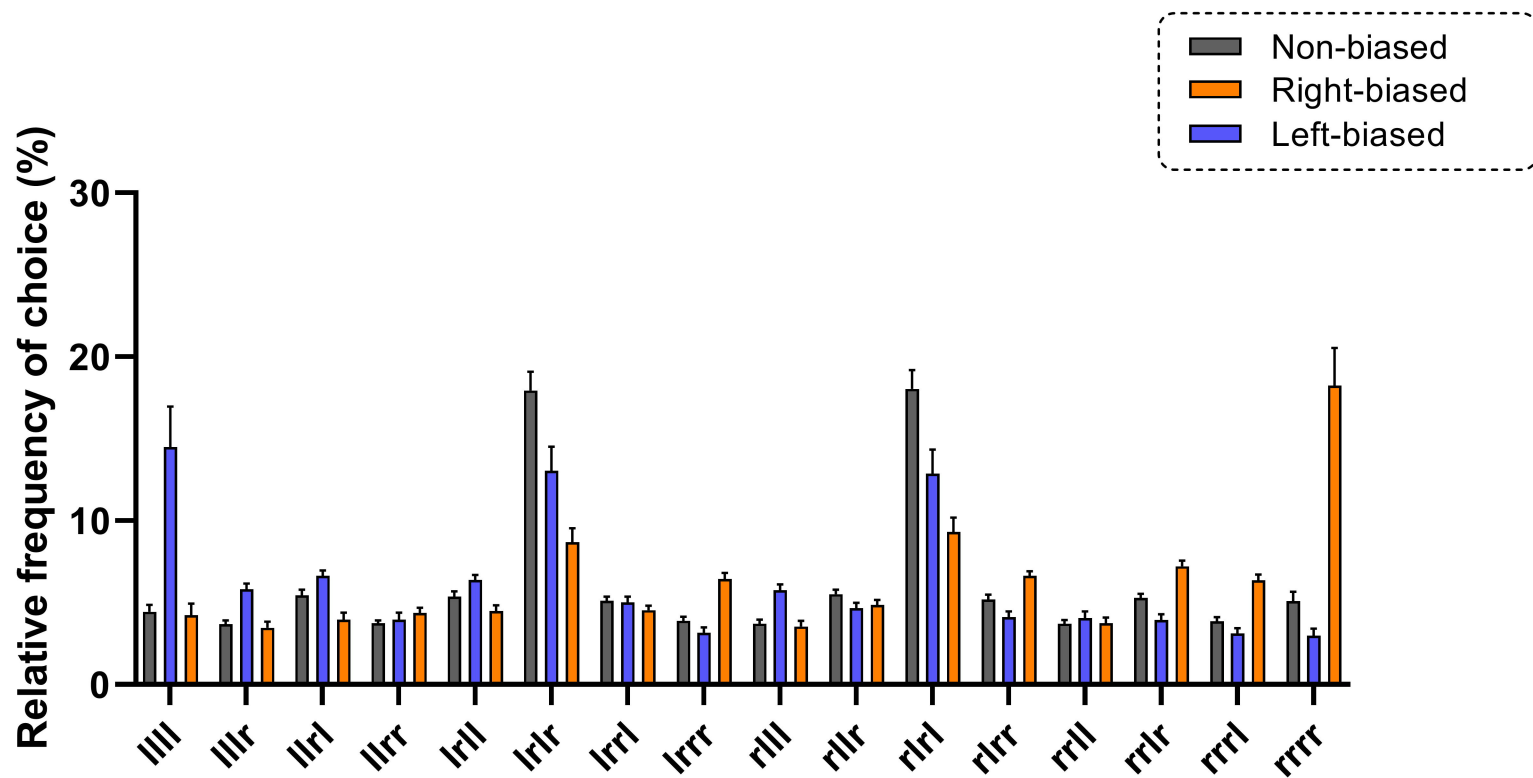

Preference for conditioned stimulus

0.6  
0.4  
0.2  
0.0

Non-preference

Left-biased

Right-biased

Baseline

Probe

\*\*\*\*

\*\*\*\*

\*\*\*\*

\*

\*

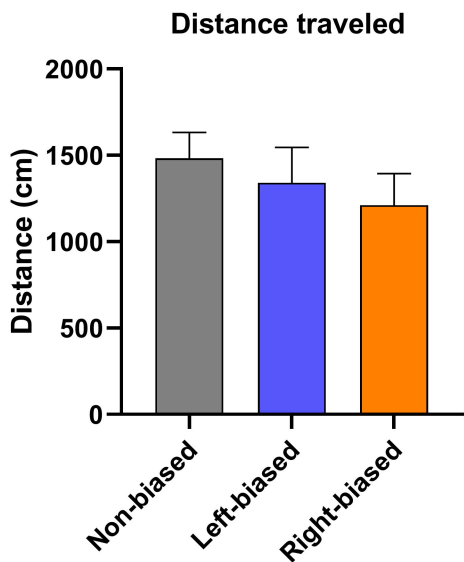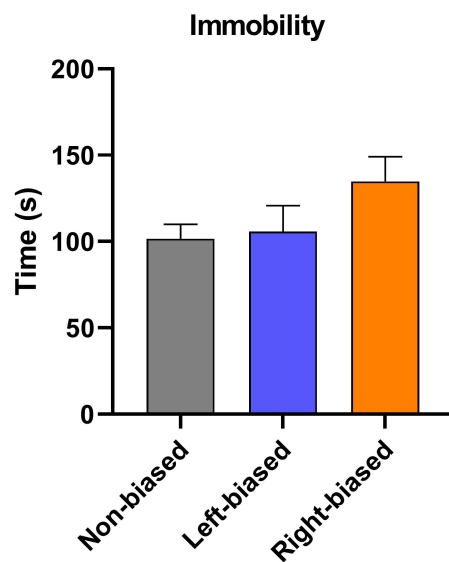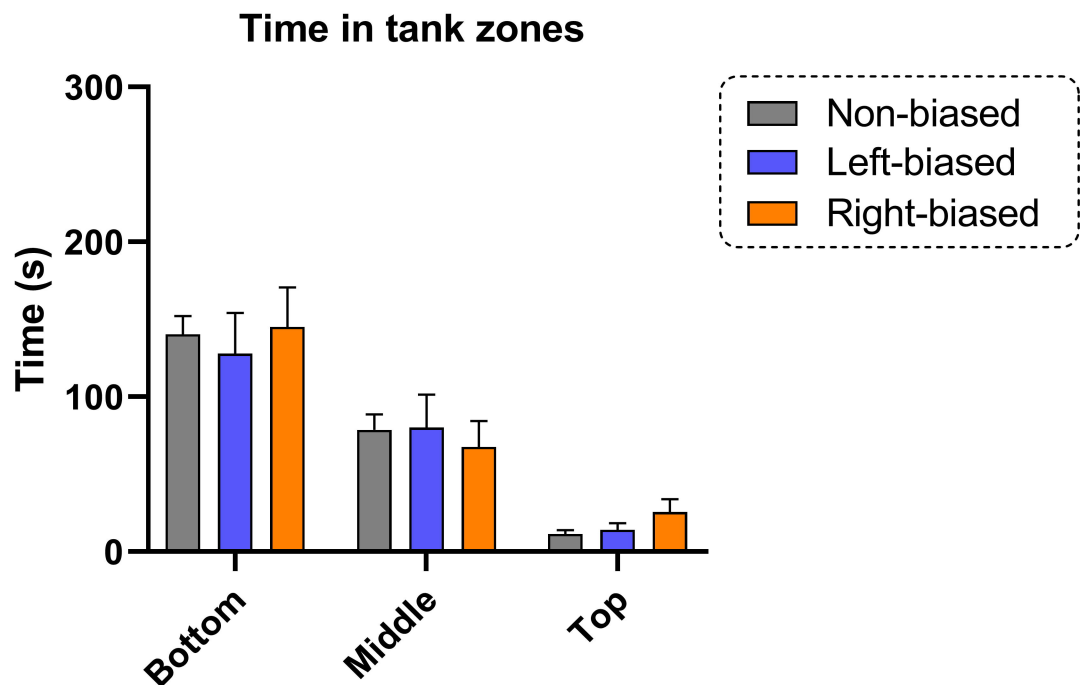

## Thigmotaxis

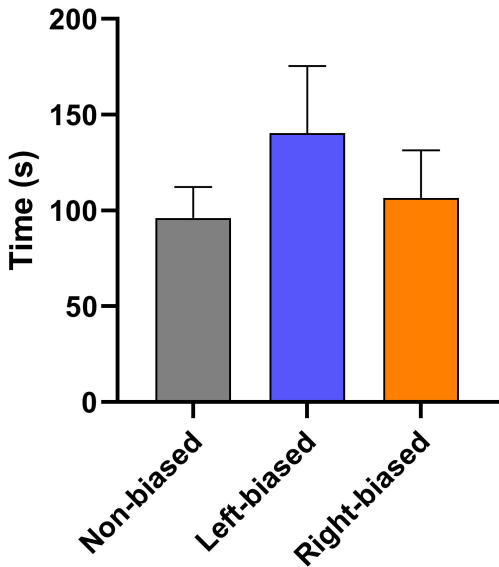

Source: https://www.biorxiv.org/content/10.1101/565309v1.full.pdf
